# Supplementary material for: When Robots Fail—A VR Investigation on Caregivers’ Tolerance towards Communication and Processing Failures
Source: MDPI journal article supplement (doi:10.3390/robotics11050106), 2022-10-07
Supplement: s1 [file s1]

**Table S2.** Used questionnaires for the failure justification task.

| Factors                  | No. of items | Scale                 | Items                                                                                                                                                                                                                                                                                                                                                 | Source                 |
|--------------------------|--------------|-----------------------|-------------------------------------------------------------------------------------------------------------------------------------------------------------------------------------------------------------------------------------------------------------------------------------------------------------------------------------------------------|------------------------|
| Attitude towards the use | 3            | Likert scale          | <p>I think it's a good idea to use the robot.</p> <p>The robot would make my life more interesting.</p> <p>It's good to make use of the robot.</p>                                                                                                                                                                                                    | Heerink et al. (2009)  |
| Failure forgiveness      | 4            | Likert scale          | <p>I forgive the robot for the incident.</p> <p>Even though the incident annoyed me, I have good will for the robot.</p> <p>Despite the incident, I want to have a positive relationship with the robot.</p> <p>Although the incident aggravated me, I am putting the negative feeling aside so I could continue the relationship with the robot.</p> | Hur & Jang (2019)      |
| Reliability              | 4            | Likert scale          | <p>I could depend on this robot to work correctly every time.</p> <p>The robot seems reliable.</p> <p>I could trust this robot to work whenever I might need it.</p> <p>If I did the same task with the robot again, it would be equally as helpful.</p>                                                                                              | Kid (2003)             |
| Likeability              | 5            | Semantic differential | <p>Dislike/Like</p> <p>Unfriendly/Friendly</p> <p>Unkind/Kind</p> <p>Unpleasant/Pleasant</p> <p>Awful/Nice</p>                                                                                                                                                                                                                                        | Bartneck et al. (2009) |
